# Supplementary material for: Porphyromonas gingivalis Outer Membrane Vesicles Promote Apoptosis via msRNA-Regulated DNA Methylation in Periodontitis
Source: PubMed Central journal article supplement (PMC9927323; doi:10.1128/spectrum.03288-22), 2023-01-11
Supplement: spectrum.03288-22-s0001.pdf [file spectrum.03288-22-s0001.pdf]

**Fig. S1**

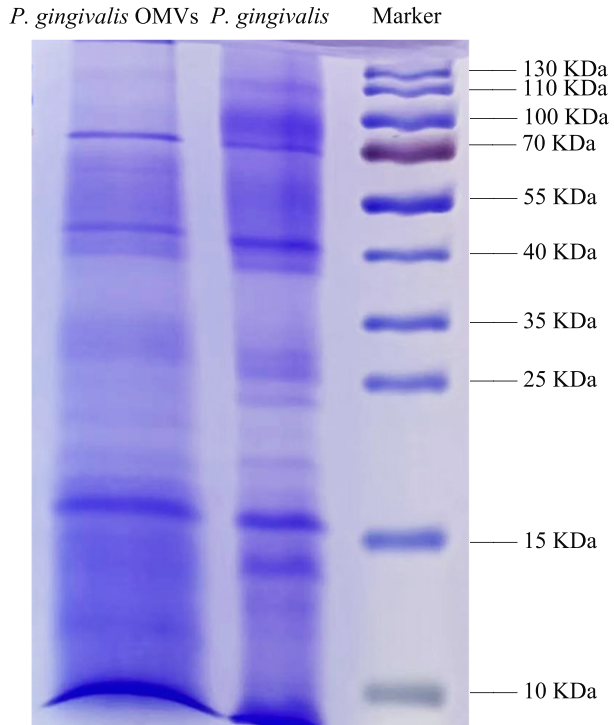

**Fig. S1** Coomassie Blue Staining of *P. gingivalis* OMVs and *P. gingivalis*.

**Fig. S2**

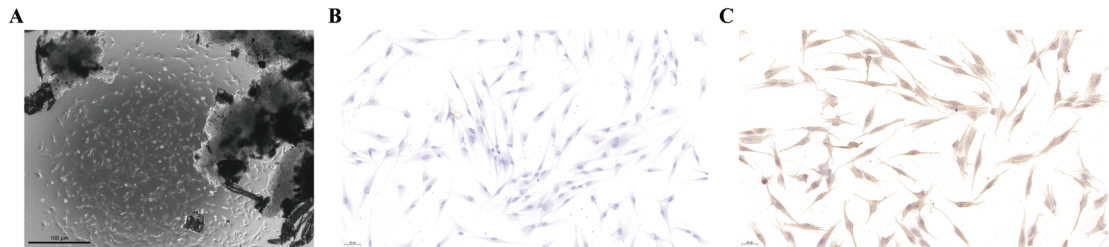

**Fig. S2** Characterization of hPDLCs. (A) Primary tissue culture under light microscopy. (B) Immunohistochemical staining showed negative expression of keratin. (C) Immunohistochemical staining showed positive expression of vimentin.

**Fig. S3**

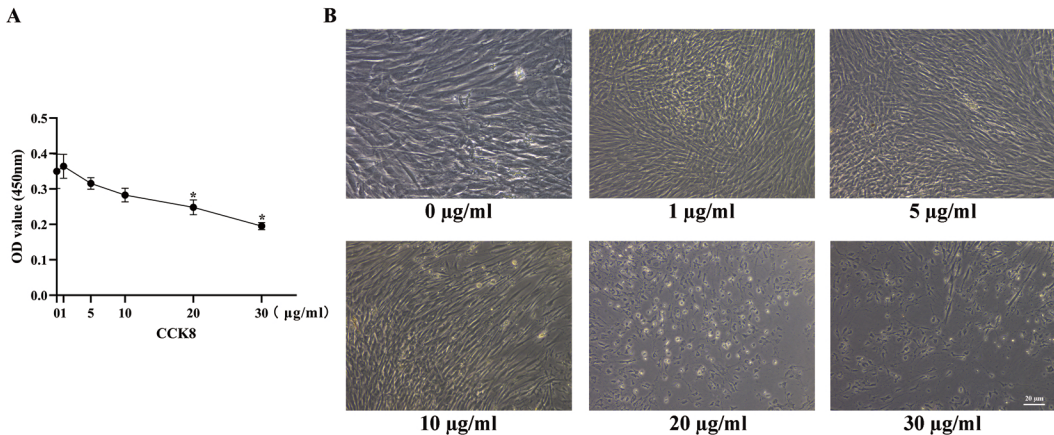

**Fig. S3** The effect of different concentration of *P. gingivalis* OMVs on the viability of hPDLCs. (A) hPDLCs treated with *P. gingivalis* OMVs (0-30 µg/ml) for 24h and viability measured by CCK-8 assay. (B) Representative images taken by light microscopy.

**Fig. S4**

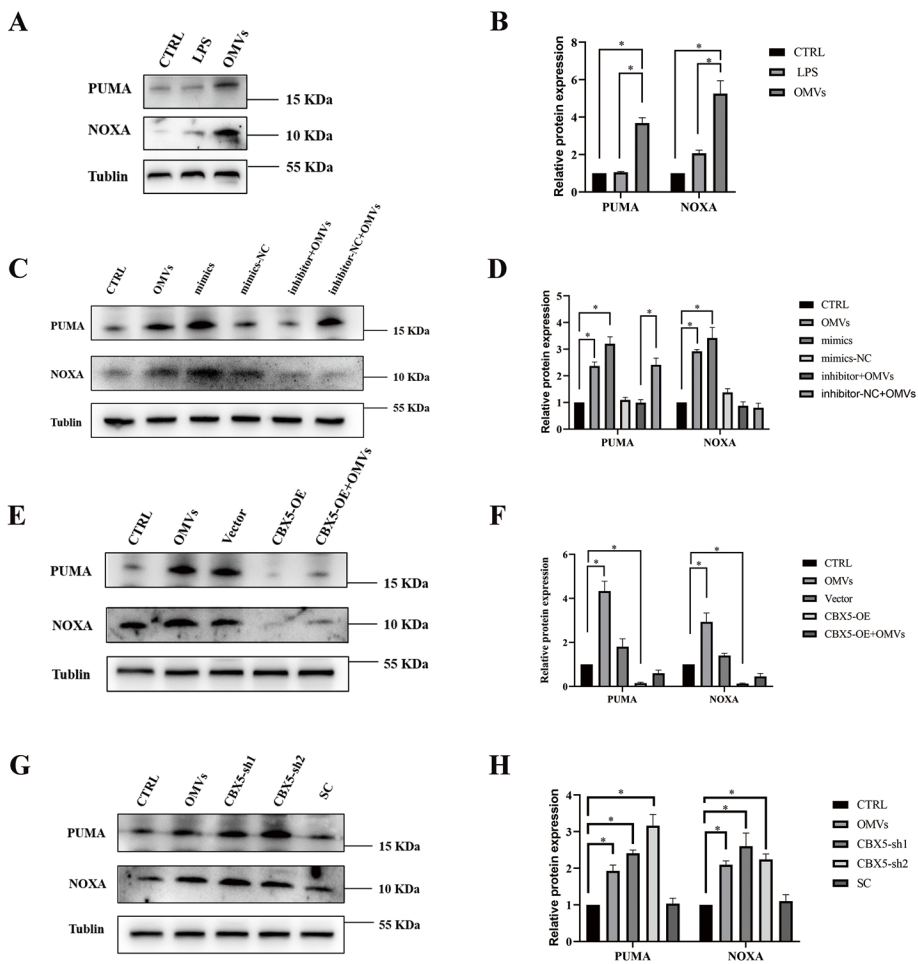

**Figure. S4** Western Blot and the densitometric analyses of PUMA and NOXA expression.  
\* $p < 0.05$ .

**Fig. S5**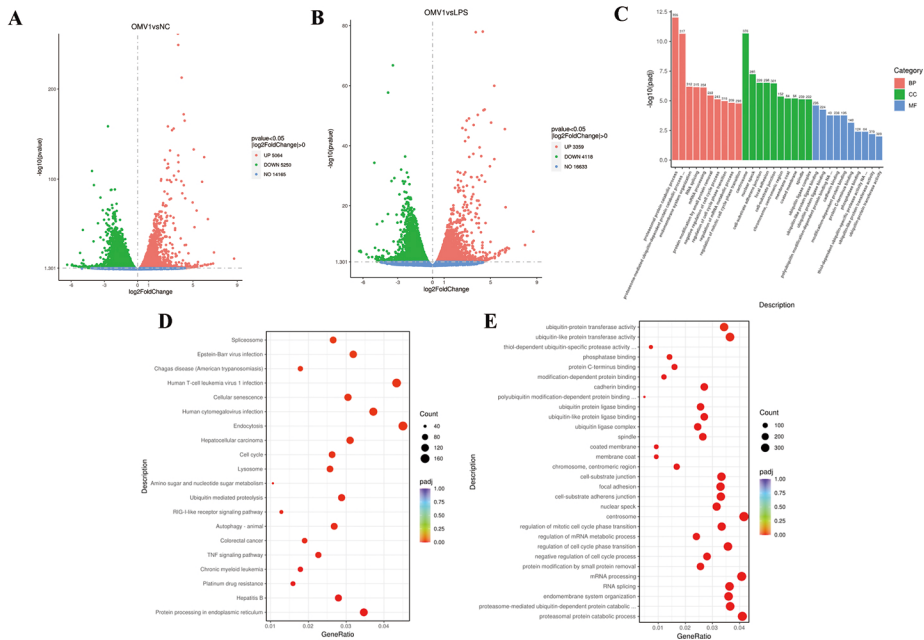

**Fig. S5** Transcriptome sequencing analysis of hPDL cells administered *P. gingivalis* OMVs. (A-B) Volcano plot of *P. gingivalis* OMVs against control and *P. gingivalis* LPS. (C) GO enrichment analysis of *P. gingivalis* OMVs. (D-E) KEGG pathway analysis of *P. gingivalis* OMVs.
